# Supplementary material for: Genetic correlation between genes targeted by lipid-lowering drugs and venous thromboembolism: A drug-target Mendelian randomization study
Source: PubMed Central journal article supplement (PMC11666180; doi:10.1097/md.0000000000040770), 2024-12-20
Supplement: medi-103-e40770-s002.pdf [file medi-103-e40770-s002.pdf]

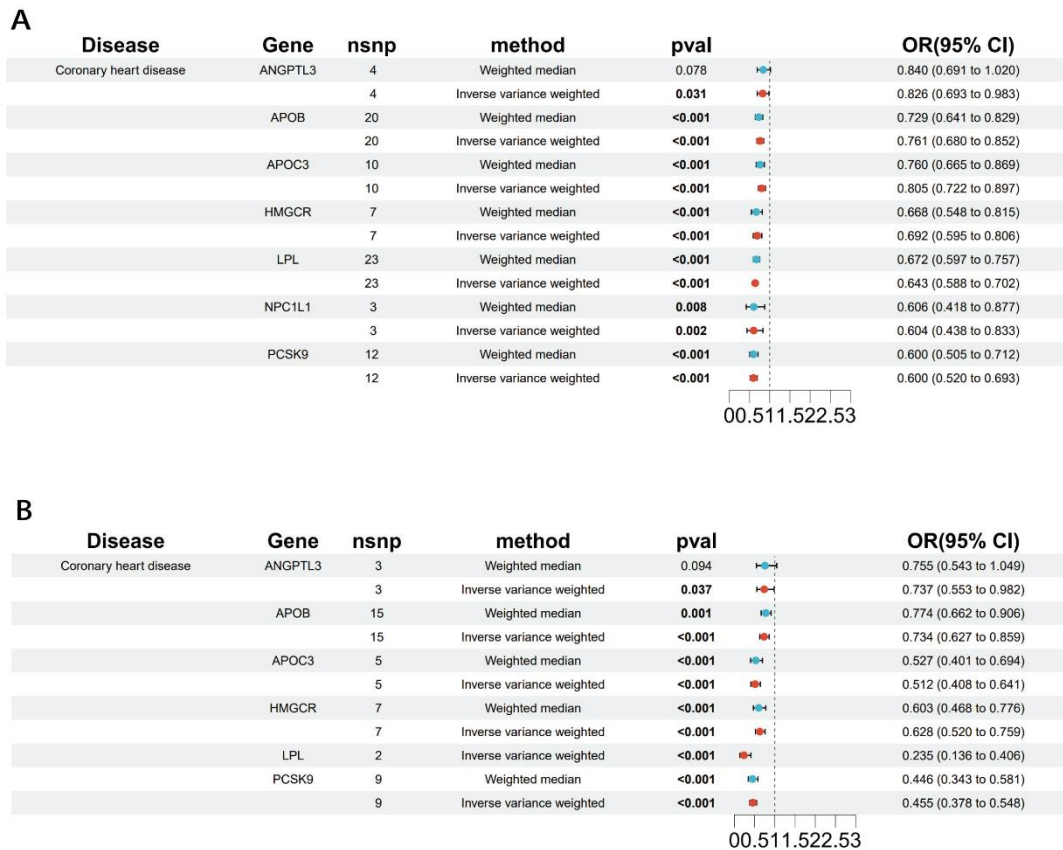

**Figure S1. Association of genetically-proxied drug targets with risk of coronary heart disease.**

Forest plot A is the association of genetically proxied lipid-lowering drug targets with risk of CHD using primary lipid modifying effect. Forest plot B is the association of genetically proxied lipid-lowering drug targets with risk of CHD using alternative lipid modifying effect. Data are represented as odds ratios (ORs) with 95% confidence intervals (error bars). An OR of <1.00 suggests a decreased risk of disease associated with lipid-lowering drug treatment. Abbreviations: CHD, Coronary heart disease; OR, odds ratio; Apo-B, Apolipoprotein-B; SNP, single-nucleotide polymorphisms; HMGCR, HMG-CoA reductase; NPC1L1, Niemann-Pick C1-like protein 1; PCSK9, proprotein convertase subtilisin/kexin type 9; APOB, Apolipoprotein B-100; ANGPTL3, angiopoietin-like 3; APOC3, Apolipoprotein C-III; LPL, lipoprotein lipase.

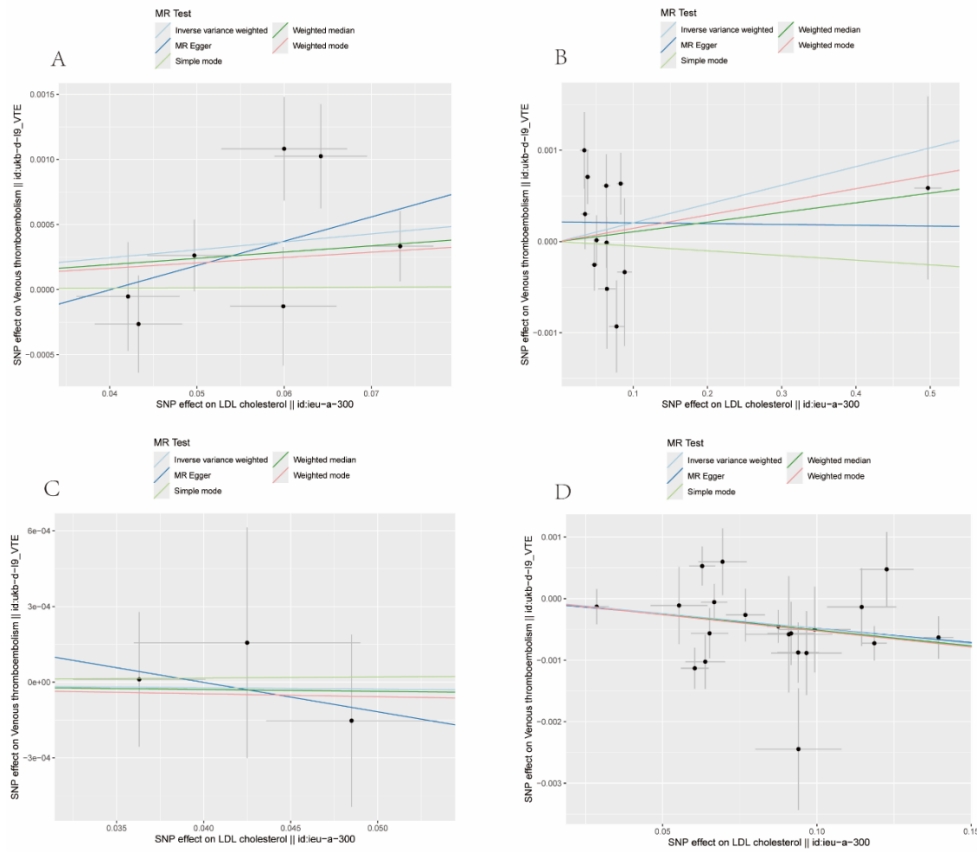

**Figure S2. Scatter plot of the association between LDL and VTE using SNPs within or near the HMGCR, PCSK9, NPC1L1, and APOB locus.**

A. HMGCR inhibitor on VTE risk; B. PCSK9 inhibitor on VTE risk; C. NPC1L1 inhibitor on VTE risk. D. APOB inhibitor on VTE risk.

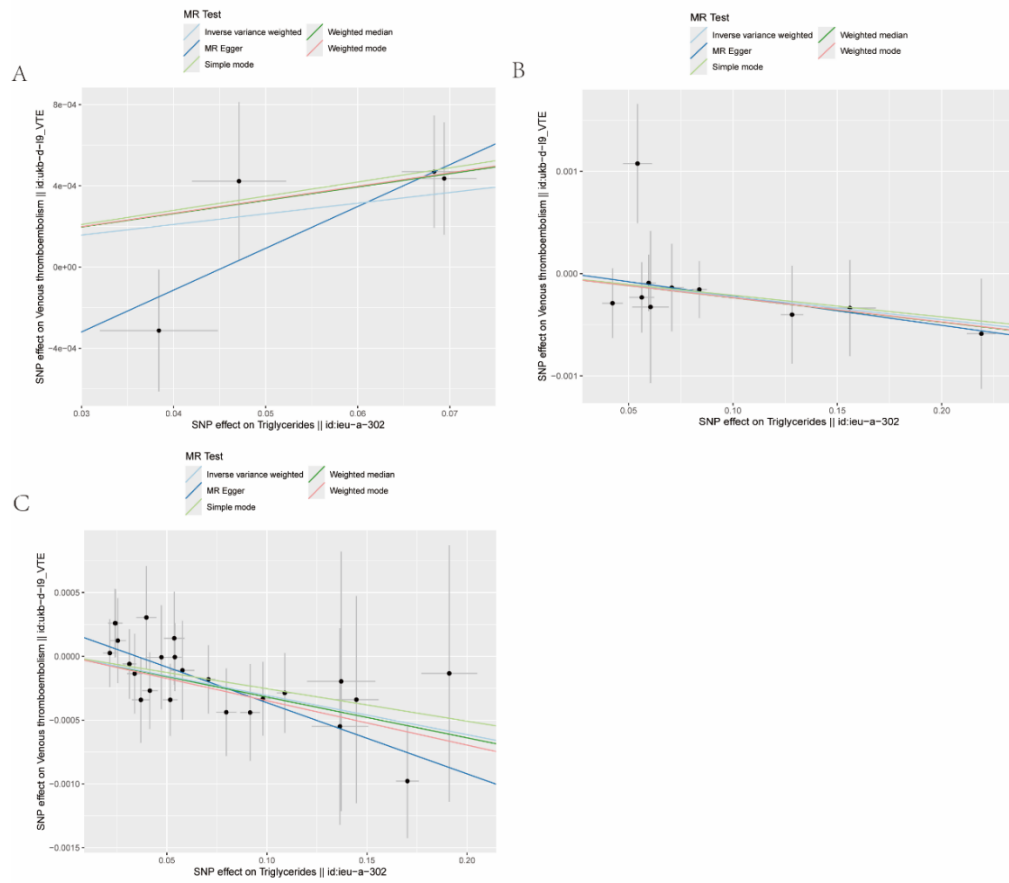

**Figure S3. Scatter plot of the association between TG and VTE using SNPs within or near the ANGPTL3, APOC3 and LPL locus.**

A. ANGPTL3 inhibitor on VTE risk; B. APOC3 inhibitor on VTE risk; C. LPL inhibitor on VTE risk.

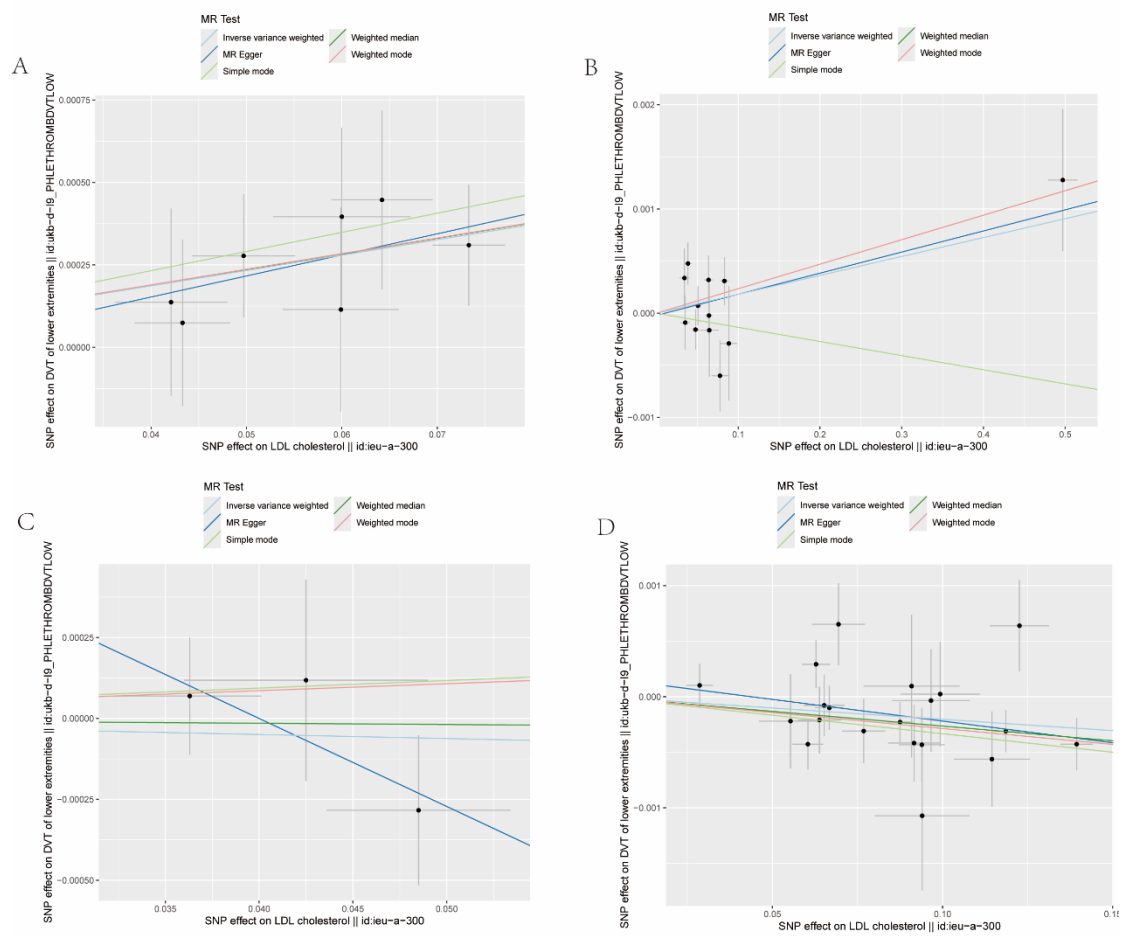

**Figure S4. Scatter plot of the association between LDL and DVT using SNPs within or near the HMGCR, PCSK9, NPC1L1, and APOB locus.**

A. HMGCR inhibitor on DVT risk; B. PCSK9 inhibitor on DVT risk; C. NPC1L1 inhibitor on DVT risk. D. APOB inhibitor on DVT risk.

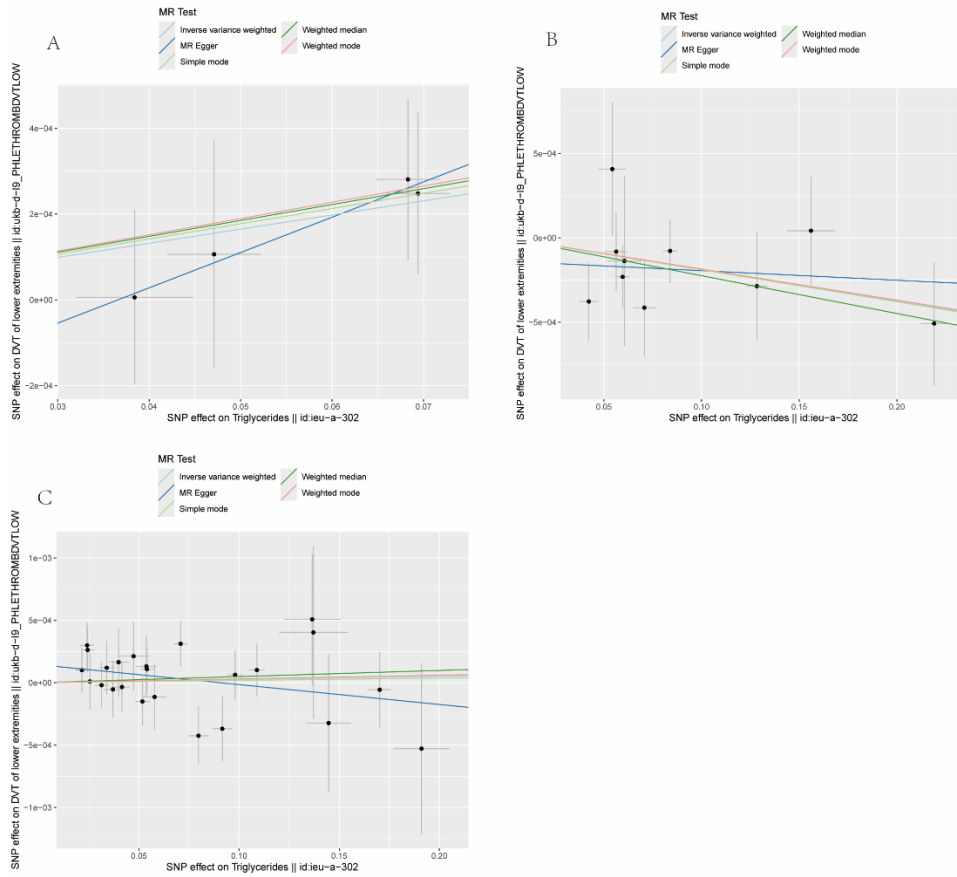

**Figure S5. Scatter plot of the association between TG and DVT using SNPs within or near the ANGPTL3, APOC3 and LPL locus.**

A. ANGPTL3 inhibitor on DVT risk; B. APOC3 inhibitor on DVT risk; C. LPL inhibitor on DVT risk.

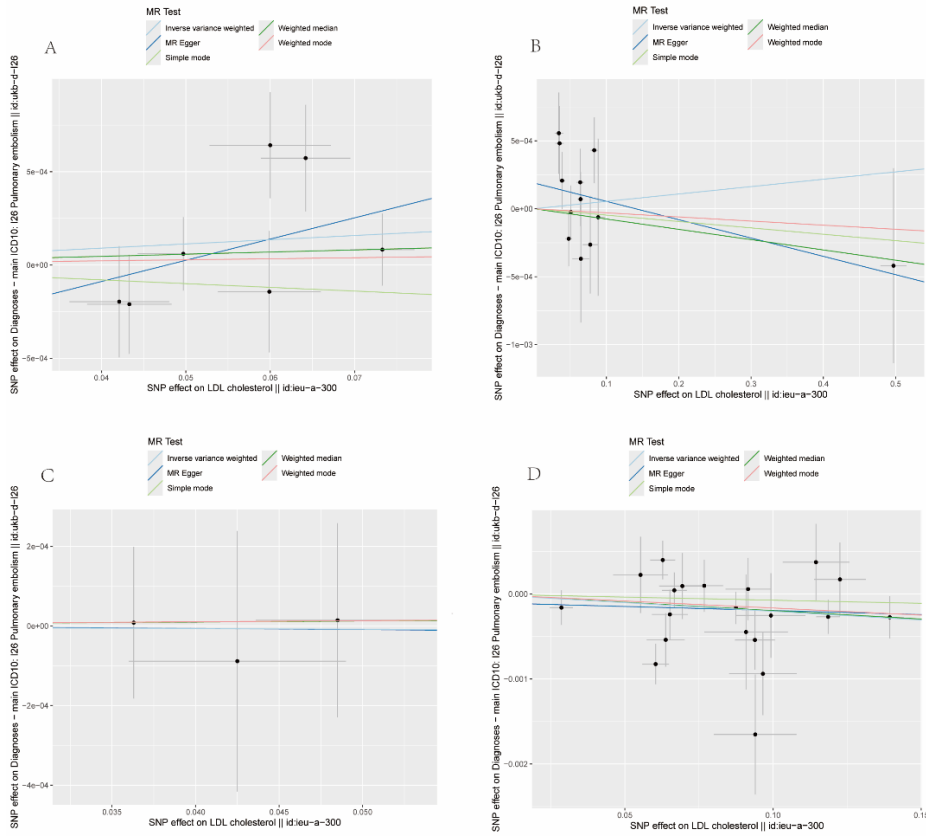

**Figure S6. Scatter plot of the association between LDL and PE using SNPs within or near the HMGCR, PCSK9, NPC1L1, and APOB locus.**

A. HMGCR inhibitor on PE risk; B. PCSK9 inhibitor on PE risk; C. NPC1L1 inhibitor on PE risk. D. APOB inhibitor on PE risk.

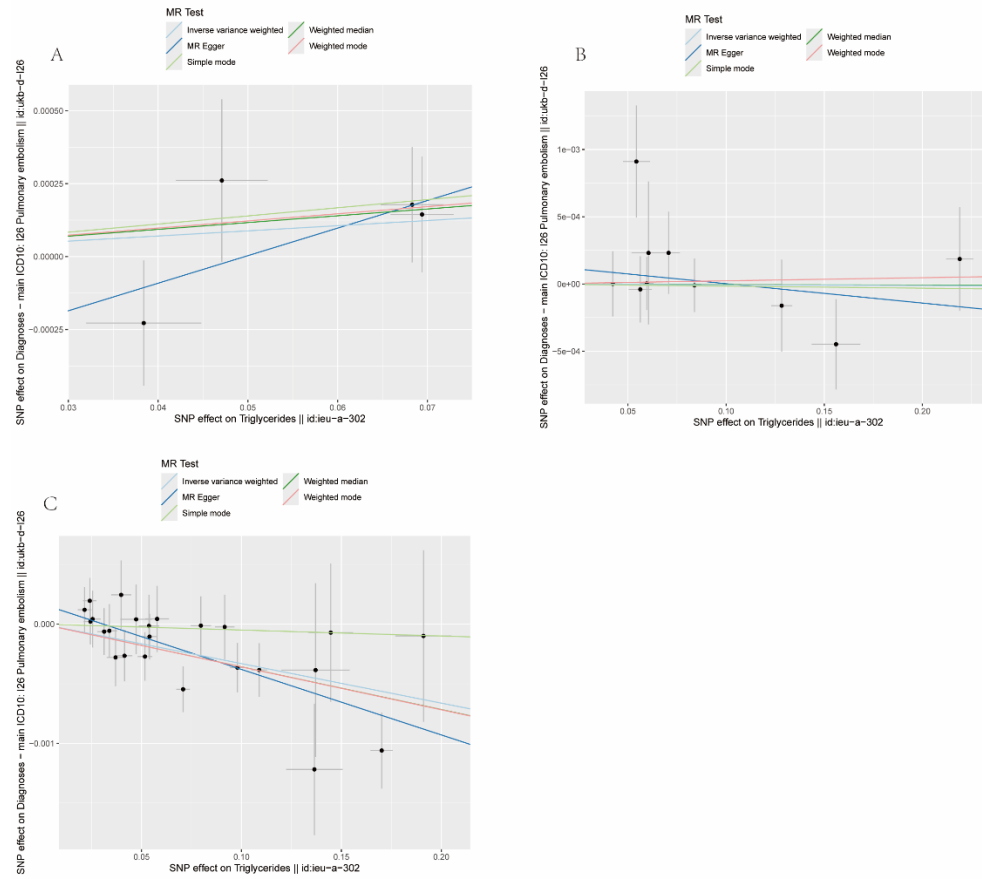

**Figure S7. Scatter plot of the association between TG and PE using SNPs within or near the ANGPTL3, APOC3 and LPL locus.**

A. ANGPTL3 inhibitor on PE risk; B. APOC3 inhibitor on PE risk; C. LPL inhibitor on PE risk.

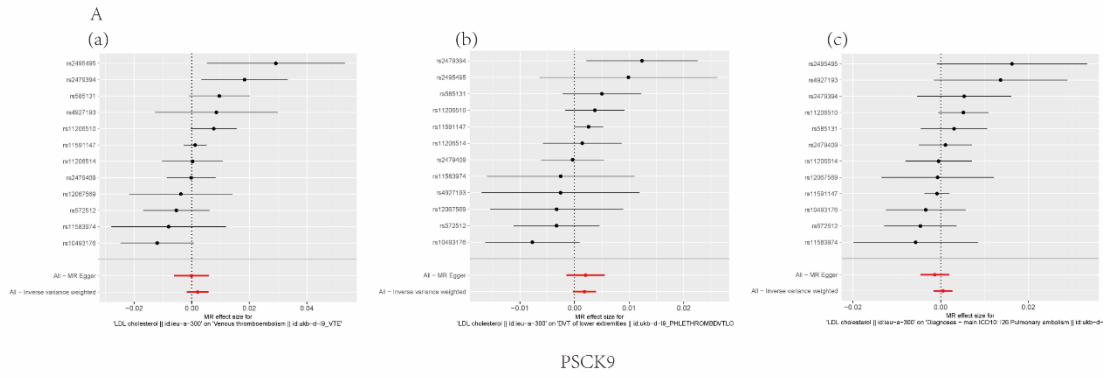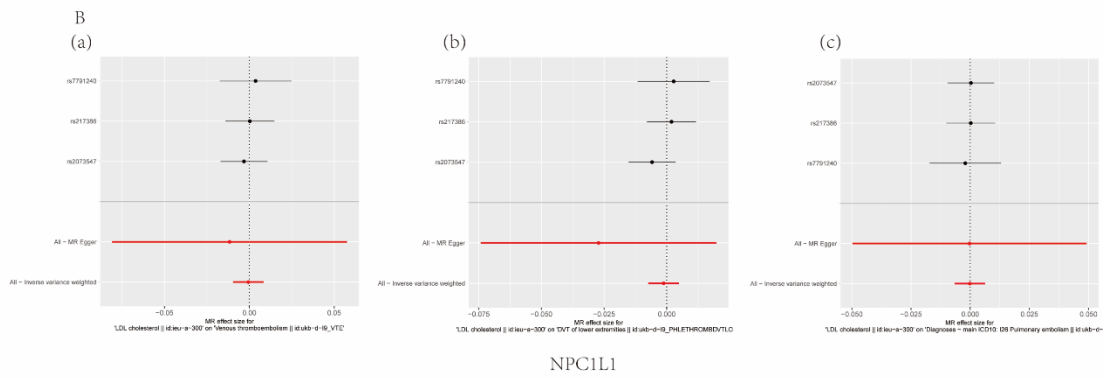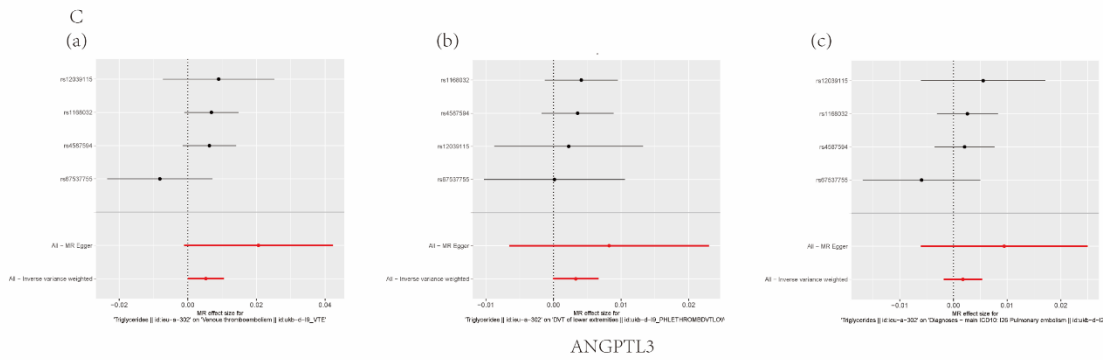



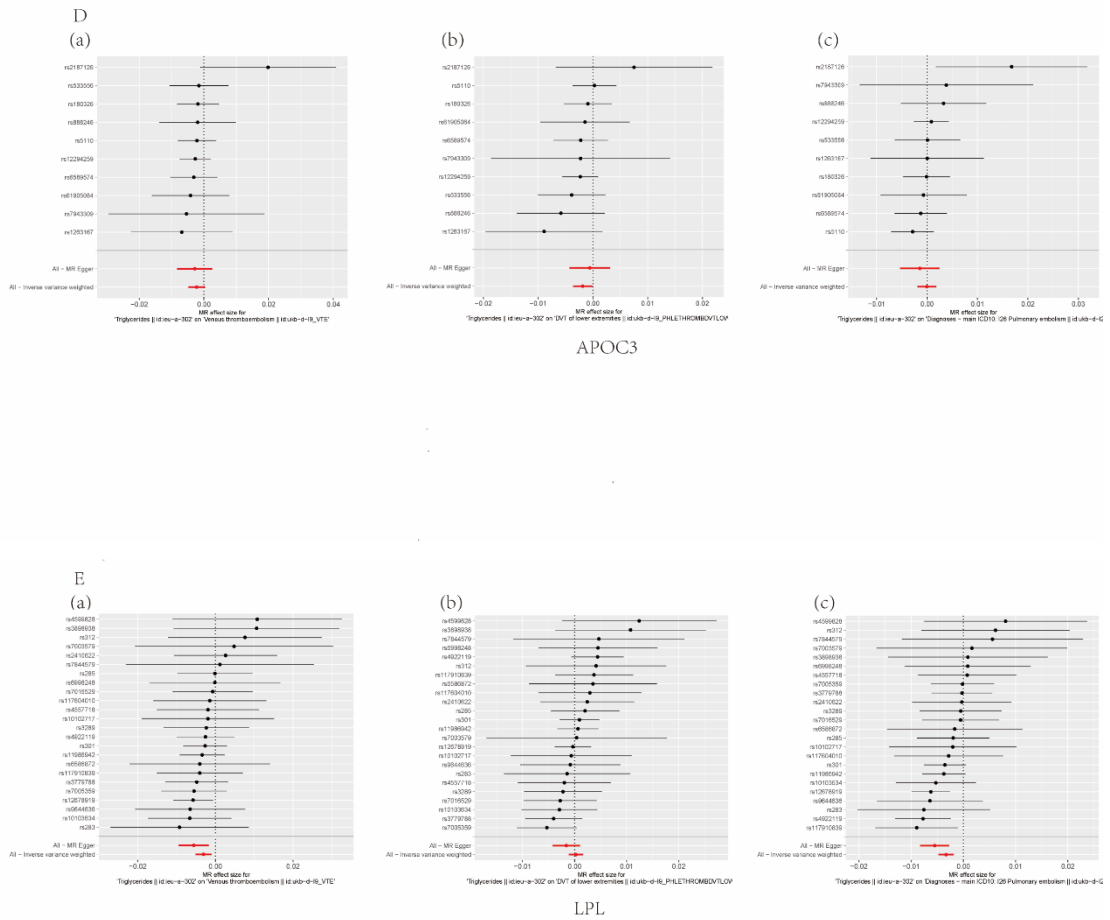

**Figure S8. Forest plots showed the casual effect estimates of each SNP in PCSK9, NPC1L1, ANGPTL3, APOC3 inhibition and LPL activation instruments on VTE, DVT and PE.**

A. (a) PCSK9 inhibitor on VTE risk; (b) PCSK9 inhibitor on DVT risk; (c) PCSK9 inhibitor on PE risk.  
 B. (a) NPC1L1 inhibitor on VTE risk; (b) NPC1L1 inhibitor on DVT risk; (c) NPC1L1 inhibitor on PE risk.  
 C. (a) ANGPTL3 inhibitor on VTE risk; (b) ANGPTL3 inhibitor on DVT risk; (c) ANGPTL3 inhibitor on PE risk.  
 D. (a) APOC3 inhibitor on VTE risk; (b) APOC3 inhibitor on DVT risk; (c) APOC3 inhibitor on PE risk.  
 E. (a) LPL activation on VTE risk; (b) LPL activation on DVT risk; (c) LPL activation on PE risk.

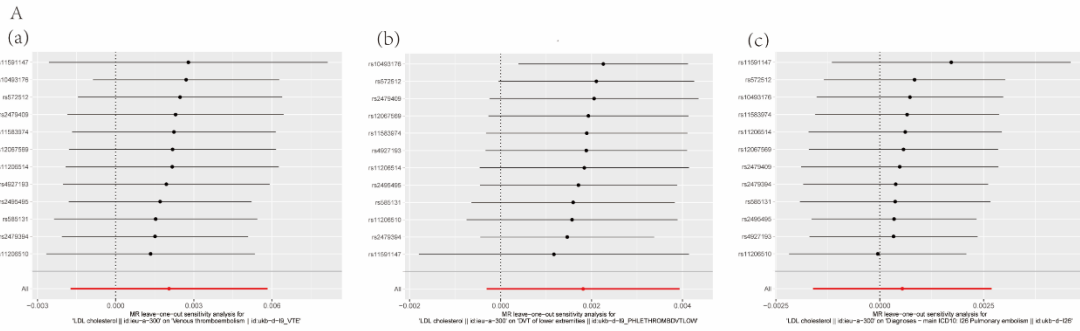

PCSK9

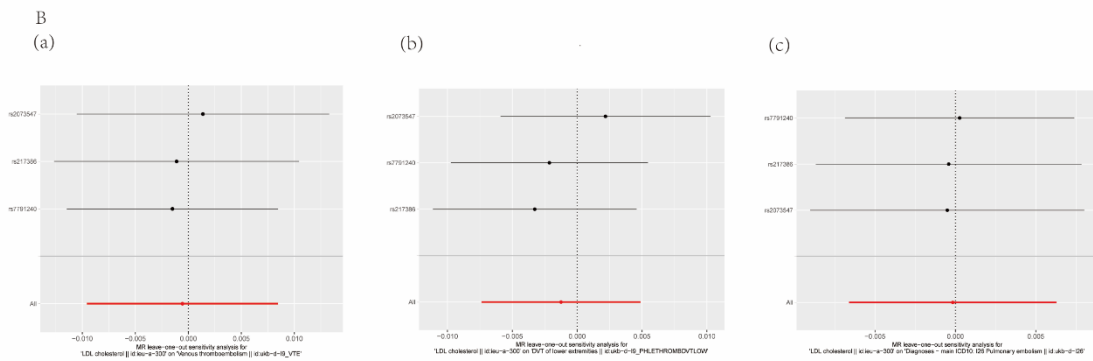

NPC1L1

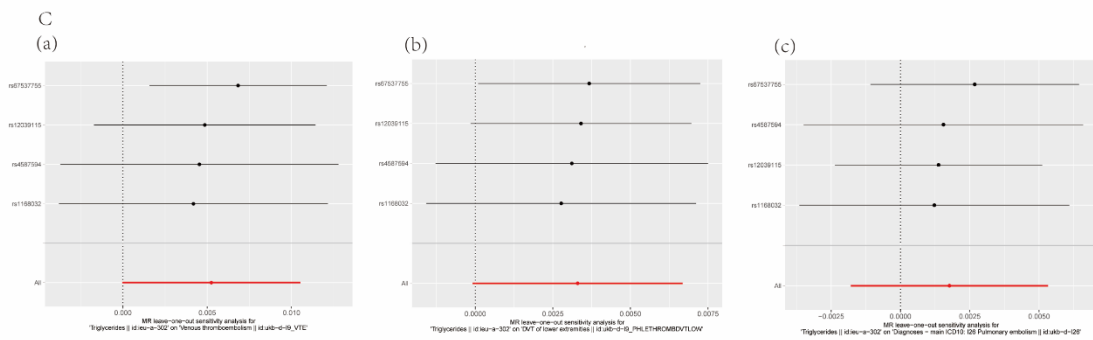

ANGPTL3

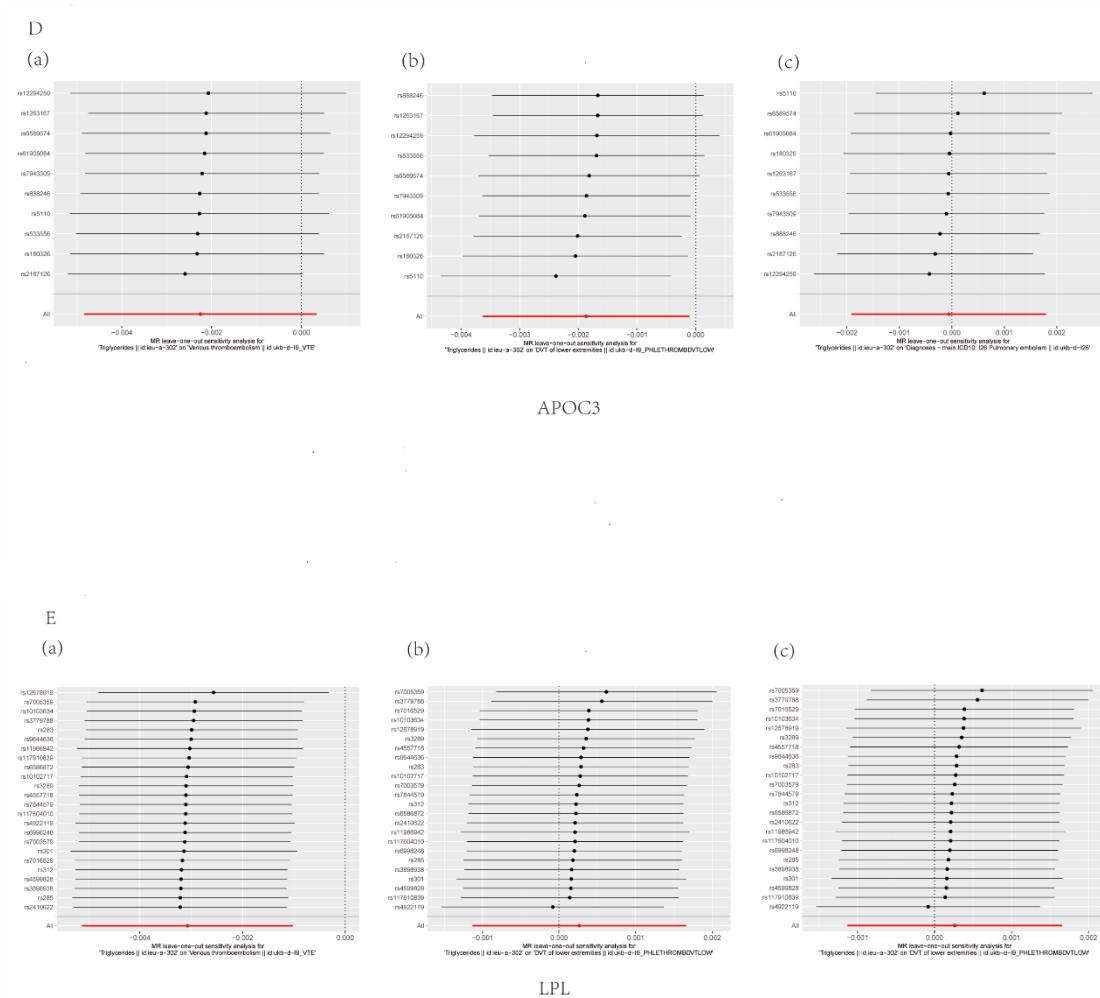

**Figure S9. Leave-one-out analysis of genetically PCSK9, NPC1L1, ANGPTL3, APOC3 inhibition and LPL activation instruments on VTE, DVT and PE.**

A. (a) PCSK9 inhibitor on VTE risk; (b) PCSK9 inhibitor on DVT risk; (c) PCSK9 inhibitor on PE risk.  
 B. (a) NPC1L1 inhibitor on VTE risk; (b) NPC1L1 inhibitor on DVT risk; (c) NPC1L1 inhibitor on PE risk.  
 C. (a) ANGPTL3 inhibitor on VTE risk; (b) ANGPTL3 inhibitor on DVT risk; (c) ANGPTL3 inhibitor on PE risk.  
 D. (a) APOC3 inhibitor on VTE risk; (b) APOC3 inhibitor on DVT risk; (c) APOC3 inhibitor on PE risk.  
 E. (a) LPL activation on VTE risk; (b) LPL activation on DVT risk; (c) LPL activation on PE risk.

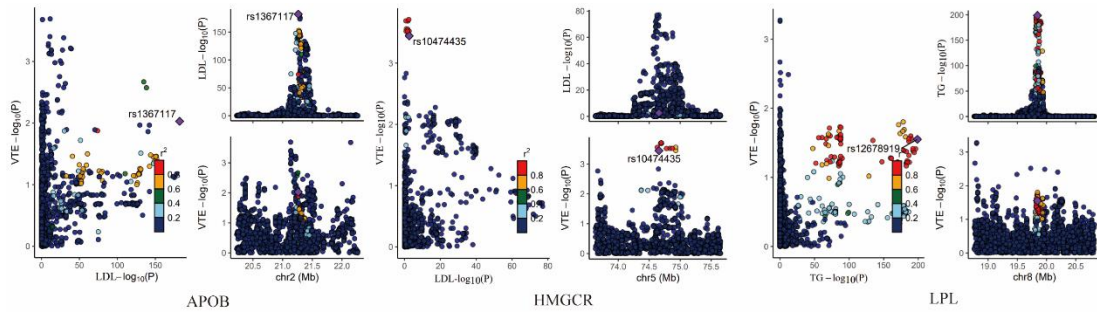

**Figure S10. The colocalization visualization result for VTE within the APOB, HMGR and LPL gene.**

A. The colocalization visualization result for LDL-C and VTE within the APOB gene. B. The colocalization visualization result for LDL-C and VTE within the HMGR gene. C. The colocalization visualization result for TG and VTE within the LPL gene.

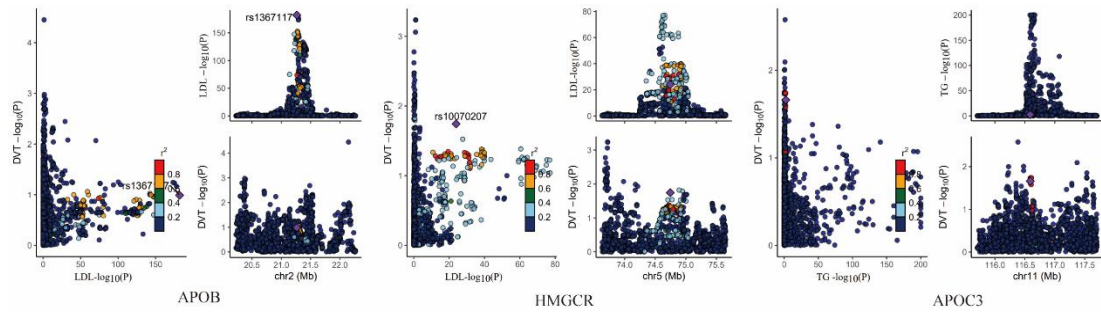

**Figure S11. The colocalization visualization result for DVT within the APOB, HMGCR and APOC3 gene.**

A. The colocalization visualization result for LDL-C and DVT within the APOB gene. B. The colocalization visualization result for LDL-C and DVT within the HMGCR gene. C. The colocalization visualization result for TG and VTE within the APOC3 gene.

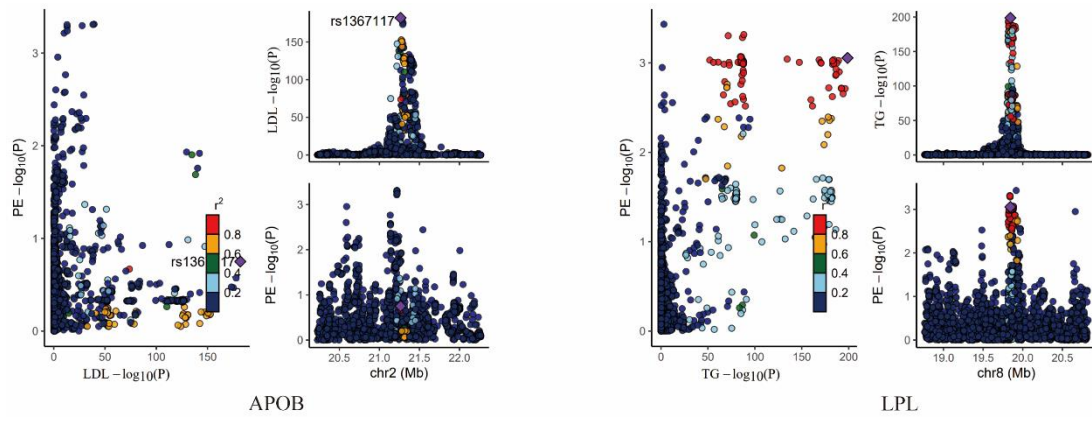

**Figure S12. The colocalization visualization result for PE within the APOB and LPL gene.**

A. The colocalization visualization result for LDL-C and PE within the APOB gene. B. The colocalization visualization result for TG and PE within the LPL gene.
